# Supplementary material
Source: publisher figshare collection journal article supplement (https://acs.figshare.com/ndownloader/files/4213741)
Supplement: Supplementary file 1 [file 4213741]

 
data_p21n 
  
_audit_creation_method            SHELXL-97 
_chemical_name_systematic 
; 
 ? 
; 
_chemical_name_common             ? 
_chemical_melting_point           ? 
_chemical_formula_moiety          ? 
_chemical_formula_sum 
 'C32 H46 N2 O4' 
_chemical_formula_weight          522.71 
  
loop_ 
 _atom_type_symbol 
 _atom_type_description 
 _atom_type_scat_dispersion_real 
 _atom_type_scat_dispersion_imag 
 _atom_type_scat_source 
 'C'  'C'   0.0033   0.0016 
 'International Tables Vol C Tables 4.2.6.8 and 6.1.1.4' 
 'H'  'H'   0.0000   0.0000 
 'International Tables Vol C Tables 4.2.6.8 and 6.1.1.4' 
 'N'  'N'   0.0061   0.0033 
 'International Tables Vol C Tables 4.2.6.8 and 6.1.1.4' 
 'O'  'O'   0.0106   0.0060 
 'International Tables Vol C Tables 4.2.6.8 and 6.1.1.4' 
  
_symmetry_cell_setting            Monoclinic 
_symmetry_space_group_name_H-M    P2(1)/n 
  
loop_ 
 _symmetry_equiv_pos_as_xyz 
 'x, y, z' 
 '-x+1/2, y+1/2, -z+1/2' 
 '-x, -y, -z' 
 'x-1/2, -y-1/2, z-1/2' 
  
_cell_length_a                    11.987(4) 
_cell_length_b                    10.059(4) 
_cell_length_c                    12.949(5) 
_cell_angle_alpha                 90.00 
_cell_angle_beta                  111.838(4) 
_cell_angle_gamma                 90.00 
_cell_volume                      1449.3(9) 
_cell_formula_units_Z             2 
_cell_measurement_temperature     296(2) 
_cell_measurement_reflns_used     2110 
_cell_measurement_theta_min       2.64 
_cell_measurement_theta_max       25.10 
  
_exptl_crystal_description        block 
_exptl_crystal_colour             colorless 
_exptl_crystal_size_max           0.25 
_exptl_crystal_size_mid           0.23 
_exptl_crystal_size_min           0.22 
_exptl_crystal_density_meas       ? 
_exptl_crystal_density_diffrn     1.198 
_exptl_crystal_density_method     'not measured' 
_exptl_crystal_F_000              568 
_exptl_absorpt_coefficient_mu     0.078 
_exptl_absorpt_correction_type    multi-scan 
_exptl_absorpt_correction_T_min   0.9807 
_exptl_absorpt_correction_T_max   0.9830 
_exptl_absorpt_process_details    SADABS 
  
_exptl_special_details 
; 
 ? 
; 
  
_diffrn_ambient_temperature       296(2) 
_diffrn_radiation_wavelength      0.71073 
_diffrn_radiation_type            MoK\a 
_diffrn_radiation_source          'fine-focus sealed tube' 
_diffrn_radiation_monochromator   graphite 
_diffrn_measurement_device_type   'Bruker APEX-II CCD' 
_diffrn_measurement_method        '\f and \w scans' 
_diffrn_detector_area_resol_mean  ? 
_diffrn_reflns_number             7707 
_diffrn_reflns_av_R_equivalents   0.0375 
_diffrn_reflns_av_sigmaI/netI     0.0418 
_diffrn_reflns_limit_h_min        -14 
_diffrn_reflns_limit_h_max        12 
_diffrn_reflns_limit_k_min        -12 
_diffrn_reflns_limit_k_max        11 
_diffrn_reflns_limit_l_min        -13 
_diffrn_reflns_limit_l_max        15 
_diffrn_reflns_theta_min          2.64 
_diffrn_reflns_theta_max          25.49 
_reflns_number_total              2675 
_reflns_number_gt                 1824 
_reflns_threshold_expression      >2sigma(I) 
  
_computing_data_collection        'Bruker APEX2' 
_computing_cell_refinement        'Bruker SAINT' 
_computing_data_reduction         'Bruker SAINT' 
_computing_structure_solution     'SHELXS-97 (Sheldrick, 2008)' 
_computing_structure_refinement   'SHELXL-97 (Sheldrick, 2008)' 
_computing_molecular_graphics     'Bruker SHELXTL' 
_computing_publication_material   'Bruker SHELXTL' 
  
_refine_special_details 
; 
 Refinement of F^2^ against ALL reflections.  The weighted R-factor wR and 
 goodness of fit S are based on F^2^, conventional R-factors R are based 
 on F, with F set to zero for negative F^2^. The threshold expression of 
 F^2^ > 2sigma(F^2^) is used only for calculating R-factors(gt) etc. and is 
 not relevant to the choice of reflections for refinement.  R-factors based 
 on F^2^ are statistically about twice as large as those based on F, and R- 
 factors based on ALL data will be even larger. 
; 
  
_refine_ls_structure_factor_coef  Fsqd 
_refine_ls_matrix_type            full 
_refine_ls_weighting_scheme       calc 
_refine_ls_weighting_details 
 'calc w=1/[\s^2^(Fo^2^)+(0.0565P)^2^+0.4882P] where P=(Fo^2^+2Fc^2^)/3' 
_atom_sites_solution_primary      direct 
_atom_sites_solution_secondary    difmap 
_atom_sites_solution_hydrogens    geom 
_refine_ls_hydrogen_treatment     constr 
_refine_ls_extinction_method      none 
_refine_ls_extinction_coef        ? 
_refine_ls_number_reflns          2675 
_refine_ls_number_parameters      174 
_refine_ls_number_restraints      0 
_refine_ls_R_factor_all           0.0759 
_refine_ls_R_factor_gt            0.0483 
_refine_ls_wR_factor_ref          0.1392 
_refine_ls_wR_factor_gt           0.1193 
_refine_ls_goodness_of_fit_ref    1.030 
_refine_ls_restrained_S_all       1.030 
_refine_ls_shift/su_max           0.000 
_refine_ls_shift/su_mean          0.000 
  
loop_ 
 _atom_site_label 
 _atom_site_type_symbol 
 _atom_site_fract_x 
 _atom_site_fract_y 
 _atom_site_fract_z 
 _atom_site_U_iso_or_equiv 
 _atom_site_adp_type 
 _atom_site_occupancy 
 _atom_site_symmetry_multiplicity 
 _atom_site_calc_flag 
 _atom_site_refinement_flags 
 _atom_site_disorder_assembly 
 _atom_site_disorder_group 
C1 C 0.83014(17) 0.2486(2) 1.12779(16) 0.0415(5) Uani 1 1 d . . . 
C2 C 0.8195(2) 0.1037(2) 1.15264(19) 0.0538(6) Uani 1 1 d . . . 
H2A H 0.8442 0.0935 1.2325 0.065 Uiso 1 1 calc R . . 
H2B H 0.8756 0.0536 1.1298 0.065 Uiso 1 1 calc R . . 
C3 C 0.6950(2) 0.0419(3) 1.0975(2) 0.0632(7) Uani 1 1 d . . . 
H3A H 0.6918 -0.0387 1.1374 0.076 Uiso 1 1 calc R . . 
H3B H 0.6360 0.1031 1.1051 0.076 Uiso 1 1 calc R . . 
C4 C 0.6596(2) 0.0082(2) 0.9761(2) 0.0609(7) Uani 1 1 d . . . 
H4A H 0.5860 -0.0435 0.9525 0.073 Uiso 1 1 calc R . . 
H4B H 0.7216 -0.0473 0.9674 0.073 Uiso 1 1 calc R . . 
C5 C 0.64039(18) 0.1279(2) 0.90030(18) 0.0521(6) Uani 1 1 d . . . 
H5 H 0.6113 0.0944 0.8238 0.062 Uiso 1 1 calc R . . 
C6 C 0.75225(17) 0.2145(2) 0.91631(15) 0.0411(5) Uani 1 1 d . . . 
C7 C 0.7186(2) 0.3266(2) 0.82987(17) 0.0554(6) Uani 1 1 d . . . 
H7A H 0.7321 0.2991 0.7636 0.066 Uiso 1 1 calc R . . 
H7B H 0.6347 0.3507 0.8090 0.066 Uiso 1 1 calc R . . 
C8 C 0.7986(2) 0.4424(2) 0.88455(19) 0.0560(6) Uani 1 1 d . . . 
H8A H 0.7640 0.5257 0.8494 0.067 Uiso 1 1 calc R . . 
H8B H 0.8779 0.4321 0.8817 0.067 Uiso 1 1 calc R . . 
C9 C 0.80408(18) 0.4362(2) 1.00378(17) 0.0434(5) Uani 1 1 d . . . 
H9 H 0.8822 0.4690 1.0547 0.052 Uiso 1 1 calc R . . 
C10 C 0.7070(2) 0.5133(2) 1.01871(18) 0.0506(6) Uani 1 1 d . . . 
C11 C 0.6300(2) 0.5800(3) 1.0252(2) 0.0689(7) Uani 1 1 d . . . 
H11 H 0.5688 0.6331 1.0304 0.083 Uiso 1 1 calc R . . 
C12 C 0.85364(18) 0.1241(2) 0.90793(17) 0.0453(5) Uani 1 1 d . . . 
H12A H 0.8801 0.0663 0.9725 0.054 Uiso 1 1 calc R . . 
H12B H 0.8186 0.0678 0.8430 0.054 Uiso 1 1 calc R . . 
C13 C 0.96328(19) 0.1891(2) 0.90021(18) 0.0476(5) Uani 1 1 d . . . 
C14 C 1.0544(2) 0.2273(2) 0.9925(2) 0.0629(7) Uani 1 1 d . . . 
H14A H 1.1244 0.2611 0.9875 0.075 Uiso 1 1 calc R . . 
H14B H 1.0475 0.2200 1.0615 0.075 Uiso 1 1 calc R . . 
C15 C 0.9651(2) 0.1966(3) 0.7861(2) 0.0733(8) Uani 1 1 d . . . 
H15A H 0.9543 0.1071 0.7561 0.088 Uiso 1 1 calc R . . 
H15B H 0.8956 0.2478 0.7407 0.088 Uiso 1 1 calc R . . 
C16 C 1.0722(3) 0.2543(3) 0.7710(3) 0.0962(10) Uani 1 1 d . . . 
H16A H 1.0770 0.3475 0.7877 0.144 Uiso 1 1 calc R . . 
H16B H 1.0653 0.2418 0.6953 0.144 Uiso 1 1 calc R . . 
H16C H 1.1434 0.2107 0.8200 0.144 Uiso 1 1 calc R . . 
N1 N 0.79383(14) 0.29209(16) 1.02180(12) 0.0371(4) Uani 1 1 d . . . 
O1 O 0.87192(14) 0.32877(16) 1.20439(11) 0.0584(5) Uani 1 1 d . . . 
O2 O 0.54758(13) 0.20847(18) 0.91047(13) 0.0640(5) Uani 1 1 d . . . 
H2 H 0.4872 0.2023 0.8537 0.096 Uiso 1 1 calc R . . 
  
loop_ 
 _atom_site_aniso_label 
 _atom_site_aniso_U_11 
 _atom_site_aniso_U_22 
 _atom_site_aniso_U_33 
 _atom_site_aniso_U_23 
 _atom_site_aniso_U_13 
 _atom_site_aniso_U_12 
C1 0.0306(11) 0.0527(13) 0.0357(11) -0.0001(10) 0.0058(9) 0.0042(9) 
C2 0.0524(14) 0.0581(14) 0.0476(12) 0.0077(11) 0.0147(11) 0.0032(11) 
C3 0.0540(15) 0.0617(16) 0.0794(18) 0.0046(13) 0.0310(13) -0.0045(12) 
C4 0.0377(12) 0.0574(15) 0.0874(19) -0.0169(13) 0.0231(12) -0.0090(11) 
C5 0.0290(11) 0.0684(15) 0.0504(13) -0.0250(11) 0.0051(9) 0.0035(10) 
C6 0.0323(11) 0.0527(12) 0.0314(10) -0.0080(9) 0.0039(8) 0.0079(9) 
C7 0.0512(14) 0.0725(16) 0.0357(11) 0.0032(11) 0.0083(10) 0.0219(12) 
C8 0.0583(14) 0.0573(14) 0.0551(14) 0.0184(11) 0.0243(11) 0.0202(12) 
C9 0.0359(11) 0.0428(12) 0.0470(12) 0.0011(9) 0.0101(9) 0.0049(9) 
C10 0.0490(14) 0.0468(13) 0.0514(13) -0.0048(10) 0.0132(11) 0.0036(11) 
C11 0.0611(16) 0.0675(16) 0.0771(18) -0.0081(14) 0.0246(14) 0.0174(14) 
C12 0.0365(11) 0.0528(13) 0.0441(11) -0.0080(10) 0.0122(9) 0.0057(10) 
C13 0.0412(12) 0.0510(13) 0.0513(13) 0.0038(10) 0.0180(10) 0.0125(10) 
C14 0.0442(14) 0.0626(15) 0.0791(17) 0.0025(13) 0.0197(13) -0.0002(12) 
C15 0.0640(17) 0.0813(19) 0.0835(19) 0.0024(15) 0.0379(15) 0.0027(15) 
C16 0.102(3) 0.102(2) 0.105(2) 0.010(2) 0.062(2) -0.013(2) 
N1 0.0318(9) 0.0415(9) 0.0309(8) -0.0028(7) 0.0035(7) 0.0036(7) 
O1 0.0594(10) 0.0662(10) 0.0342(8) -0.0110(7) -0.0006(7) -0.0018(8) 
O2 0.0311(8) 0.0892(12) 0.0599(10) -0.0243(9) 0.0032(7) 0.0118(8) 
  
_geom_special_details 
; 
 All esds (except the esd in the dihedral angle between two l.s. planes) 
 are estimated using the full covariance matrix.  The cell esds are taken 
 into account individually in the estimation of esds in distances, angles 
 and torsion angles; correlations between esds in cell parameters are only 
 used when they are defined by crystal symmetry.  An approximate (isotropic) 
 treatment of cell esds is used for estimating esds involving l.s. planes. 
; 
  
loop_ 
 _geom_bond_atom_site_label_1 
 _geom_bond_atom_site_label_2 
 _geom_bond_distance 
 _geom_bond_site_symmetry_2 
 _geom_bond_publ_flag 
C1 O1 1.231(2) . ? 
C1 N1 1.349(2) . ? 
C1 C2 1.508(3) . ? 
C2 C3 1.527(3) . ? 
C2 H2A 0.9700 . ? 
C2 H2B 0.9700 . ? 
C3 C4 1.506(3) . ? 
C3 H3A 0.9700 . ? 
C3 H3B 0.9700 . ? 
C4 C5 1.516(4) . ? 
C4 H4A 0.9700 . ? 
C4 H4B 0.9700 . ? 
C5 O2 1.421(2) . ? 
C5 C6 1.547(3) . ? 
C5 H5 0.9800 . ? 
C6 N1 1.489(2) . ? 
C6 C7 1.534(3) . ? 
C6 C12 1.553(3) . ? 
C7 C8 1.507(3) . ? 
C7 H7A 0.9700 . ? 
C7 H7B 0.9700 . ? 
C8 C9 1.522(3) . ? 
C8 H8A 0.9700 . ? 
C8 H8B 0.9700 . ? 
C9 C10 1.470(3) . ? 
C9 N1 1.481(3) . ? 
C9 H9 0.9800 . ? 
C10 C11 1.169(3) . ? 
C11 H11 0.9300 . ? 
C12 C13 1.504(3) . ? 
C12 H12A 0.9700 . ? 
C12 H12B 0.9700 . ? 
C13 C14 1.341(3) . ? 
C13 C15 1.487(3) . ? 
C14 H14A 0.9300 . ? 
C14 H14B 0.9300 . ? 
C15 C16 1.487(4) . ? 
C15 H15A 0.9700 . ? 
C15 H15B 0.9700 . ? 
C16 H16A 0.9600 . ? 
C16 H16B 0.9600 . ? 
C16 H16C 0.9600 . ? 
O2 H2 0.8200 . ? 
  
loop_ 
 _geom_angle_atom_site_label_1 
 _geom_angle_atom_site_label_2 
 _geom_angle_atom_site_label_3 
 _geom_angle 
 _geom_angle_site_symmetry_1 
 _geom_angle_site_symmetry_3 
 _geom_angle_publ_flag 
O1 C1 N1 119.21(19) . . ? 
O1 C1 C2 120.16(19) . . ? 
N1 C1 C2 120.63(18) . . ? 
C1 C2 C3 116.05(19) . . ? 
C1 C2 H2A 108.3 . . ? 
C3 C2 H2A 108.3 . . ? 
C1 C2 H2B 108.3 . . ? 
C3 C2 H2B 108.3 . . ? 
H2A C2 H2B 107.4 . . ? 
C4 C3 C2 115.3(2) . . ? 
C4 C3 H3A 108.4 . . ? 
C2 C3 H3A 108.4 . . ? 
C4 C3 H3B 108.4 . . ? 
C2 C3 H3B 108.4 . . ? 
H3A C3 H3B 107.5 . . ? 
C3 C4 C5 114.4(2) . . ? 
C3 C4 H4A 108.7 . . ? 
C5 C4 H4A 108.7 . . ? 
C3 C4 H4B 108.7 . . ? 
C5 C4 H4B 108.7 . . ? 
H4A C4 H4B 107.6 . . ? 
O2 C5 C4 109.16(19) . . ? 
O2 C5 C6 109.63(18) . . ? 
C4 C5 C6 116.45(17) . . ? 
O2 C5 H5 107.1 . . ? 
C4 C5 H5 107.1 . . ? 
C6 C5 H5 107.1 . . ? 
N1 C6 C7 101.02(16) . . ? 
N1 C6 C5 113.31(16) . . ? 
C7 C6 C5 109.70(17) . . ? 
N1 C6 C12 111.54(15) . . ? 
C7 C6 C12 112.28(17) . . ? 
C5 C6 C12 108.86(17) . . ? 
C8 C7 C6 106.08(17) . . ? 
C8 C7 H7A 110.5 . . ? 
C6 C7 H7A 110.5 . . ? 
C8 C7 H7B 110.5 . . ? 
C6 C7 H7B 110.5 . . ? 
H7A C7 H7B 108.7 . . ? 
C7 C8 C9 103.02(18) . . ? 
C7 C8 H8A 111.2 . . ? 
C9 C8 H8A 111.2 . . ? 
C7 C8 H8B 111.2 . . ? 
C9 C8 H8B 111.2 . . ? 
H8A C8 H8B 109.1 . . ? 
C10 C9 N1 112.30(17) . . ? 
C10 C9 C8 111.99(17) . . ? 
N1 C9 C8 103.00(17) . . ? 
C10 C9 H9 109.8 . . ? 
N1 C9 H9 109.8 . . ? 
C8 C9 H9 109.8 . . ? 
C11 C10 C9 175.6(3) . . ? 
C10 C11 H11 180.0 . . ? 
C13 C12 C6 118.46(18) . . ? 
C13 C12 H12A 107.7 . . ? 
C6 C12 H12A 107.7 . . ? 
C13 C12 H12B 107.7 . . ? 
C6 C12 H12B 107.7 . . ? 
H12A C12 H12B 107.1 . . ? 
C14 C13 C15 124.2(2) . . ? 
C14 C13 C12 120.5(2) . . ? 
C15 C13 C12 115.1(2) . . ? 
C13 C14 H14A 120.0 . . ? 
C13 C14 H14B 120.0 . . ? 
H14A C14 H14B 120.0 . . ? 
C16 C15 C13 118.9(3) . . ? 
C16 C15 H15A 107.6 . . ? 
C13 C15 H15A 107.6 . . ? 
C16 C15 H15B 107.6 . . ? 
C13 C15 H15B 107.6 . . ? 
H15A C15 H15B 107.0 . . ? 
C15 C16 H16A 109.5 . . ? 
C15 C16 H16B 109.5 . . ? 
H16A C16 H16B 109.5 . . ? 
C15 C16 H16C 109.5 . . ? 
H16A C16 H16C 109.5 . . ? 
H16B C16 H16C 109.5 . . ? 
C1 N1 C9 117.62(16) . . ? 
C1 N1 C6 129.38(17) . . ? 
C9 N1 C6 112.82(15) . . ? 
C5 O2 H2 109.5 . . ? 
  
loop_ 
 _geom_torsion_atom_site_label_1 
 _geom_torsion_atom_site_label_2 
 _geom_torsion_atom_site_label_3 
 _geom_torsion_atom_site_label_4 
 _geom_torsion 
 _geom_torsion_site_symmetry_1 
 _geom_torsion_site_symmetry_2 
 _geom_torsion_site_symmetry_3 
 _geom_torsion_site_symmetry_4 
 _geom_torsion_publ_flag 
O1 C1 C2 C3 126.0(2) . . . . ? 
N1 C1 C2 C3 -53.7(3) . . . . ? 
C1 C2 C3 C4 77.3(3) . . . . ? 
C2 C3 C4 C5 -67.9(3) . . . . ? 
C3 C4 C5 O2 -59.7(2) . . . . ? 
C3 C4 C5 C6 65.0(3) . . . . ? 
O2 C5 C6 N1 53.8(2) . . . . ? 
C4 C5 C6 N1 -70.7(2) . . . . ? 
O2 C5 C6 C7 -58.2(2) . . . . ? 
C4 C5 C6 C7 177.28(18) . . . . ? 
O2 C5 C6 C12 178.57(16) . . . . ? 
C4 C5 C6 C12 54.1(2) . . . . ? 
N1 C6 C7 C8 28.8(2) . . . . ? 
C5 C6 C7 C8 148.67(17) . . . . ? 
C12 C6 C7 C8 -90.1(2) . . . . ? 
C6 C7 C8 C9 -38.5(2) . . . . ? 
C7 C8 C9 C10 -89.3(2) . . . . ? 
C7 C8 C9 N1 31.6(2) . . . . ? 
N1 C9 C10 C11 -146(3) . . . . ? 
C8 C9 C10 C11 -31(3) . . . . ? 
N1 C6 C12 C13 -65.1(2) . . . . ? 
C7 C6 C12 C13 47.5(2) . . . . ? 
C5 C6 C12 C13 169.14(18) . . . . ? 
C6 C12 C13 C14 84.5(3) . . . . ? 
C6 C12 C13 C15 -100.0(2) . . . . ? 
C14 C13 C15 C16 -2.3(4) . . . . ? 
C12 C13 C15 C16 -177.6(2) . . . . ? 
O1 C1 N1 C9 -1.4(3) . . . . ? 
C2 C1 N1 C9 178.44(18) . . . . ? 
O1 C1 N1 C6 173.28(18) . . . . ? 
C2 C1 N1 C6 -6.9(3) . . . . ? 
C10 C9 N1 C1 -78.2(2) . . . . ? 
C8 C9 N1 C1 161.10(17) . . . . ? 
C10 C9 N1 C6 106.26(19) . . . . ? 
C8 C9 N1 C6 -14.4(2) . . . . ? 
C7 C6 N1 C1 176.61(19) . . . . ? 
C5 C6 N1 C1 59.4(3) . . . . ? 
C12 C6 N1 C1 -63.9(3) . . . . ? 
C7 C6 N1 C9 -8.6(2) . . . . ? 
C5 C6 N1 C9 -125.80(18) . . . . ? 
C12 C6 N1 C9 110.93(18) . . . . ? 
  
_diffrn_measured_fraction_theta_max    0.993 
_diffrn_reflns_theta_full              25.49 
_diffrn_measured_fraction_theta_full   0.993 
_refine_diff_density_max    0.313 
_refine_diff_density_min   -0.236 
_refine_diff_density_rms    0.037 
